# Supplementary material
Source: PubMed Central journal article supplement (PMC7153972)
Supplement: NIHMS1055190-supplement-1.pdf [file NIHMS1055190-supplement-1.pdf]

## Appendix

### Supplemental Methods

#### Enrollment Criteria:

Acute circulatory failure was defined as hypotension (systolic blood pressure <90 mmHg, or a mean arterial pressure <65 mmHg for  $\geq 30$  min); persistent tachycardia (heart rate >120 bpm for  $\geq 30$  min); and/or serum markers suggesting organ hypoperfusion (acidosis with a serum pH <7.3 or lactic acidosis >2 meq/l). Patients were excluded if they were receiving positive pressure ventilation, had evidence of pulmonary edema, or if further IV fluid administration posed a clinical risk. Patients also were excluded if they had primary traumatic, cardiogenic, obstructive, or neurogenic shock; or were < 18 years-old; incarcerated; or pregnant.

**Supplementary Table #1:** Secondary analysis of cIVC performance by the novice sonologist and the corresponding performance under expert sonologist review

| Novice Sonologist | Point of cIVC measurement                | cIVC cutoff % | ROC [95% CI]        | Sensitivity % [95% CI] | Specificity % [95% CI] |
|-------------------|------------------------------------------|---------------|---------------------|------------------------|------------------------|
| 1                 | Expert Sonologist<br>N = 22 <sup>a</sup> | $\geq 25$     | 0.83<br>[0.67-0.98] | 90.0<br>[59.6-98.2]    | 75.0<br>[46.8-91.1]    |
|                   | Novice Sonologist<br>N = 21 <sup>b</sup> | $\geq 25$     | 0.65<br>[0.49-0.81] | 55.6<br>[26.7-81.1]    | 75.0<br>[46.8-91.9]    |
| 2                 | Expert Sonologist<br>N = 21              | $\geq 25$     | 0.85<br>[0.72-0.98] | 90.9<br>[62.3-98.4]    | 70.0<br>[39.7-89.2]    |
|                   | Novice Sonologist<br>N = 21              | $\geq 25$     | 0.80<br>[0.66-0.94] | 63.6<br>[35.4-84.8]    | 70.0<br>[39.7-89.2]    |
| 3                 | Expert Sonologist<br>N = 33              | $\geq 25$     | 0.87<br>[0.76-0.99] | 85.0<br>[64.0-94.8]    | 84.6<br>[57.8-95.7]    |
|                   | Novice Sonologist<br>N = 33              | $\geq 25$     | 0.76<br>[0.62-0.90] | 75.0<br>[53.1-88.8]    | 61.5<br>[35.5-82.3]    |

Nine ultrasounds in the expert review and novice analysis performed by sonologists 4 and 5 were excluded due to small numbers.
